# Supplementary material for: Cytoplasmic m1A reader YTHDF3 inhibits trophoblast invasion by downregulation of m1A-methylated IGF1R
Source: PubMed Central journal article supplement (PMC7062805; doi:10.1038/s41421-020-0144-4), 2020-03-10
Supplement: 41421_2020_144_MOESM1_ESM.pdf [file 41421_2020_144_MOESM1_ESM.pdf]

## Supplementary information

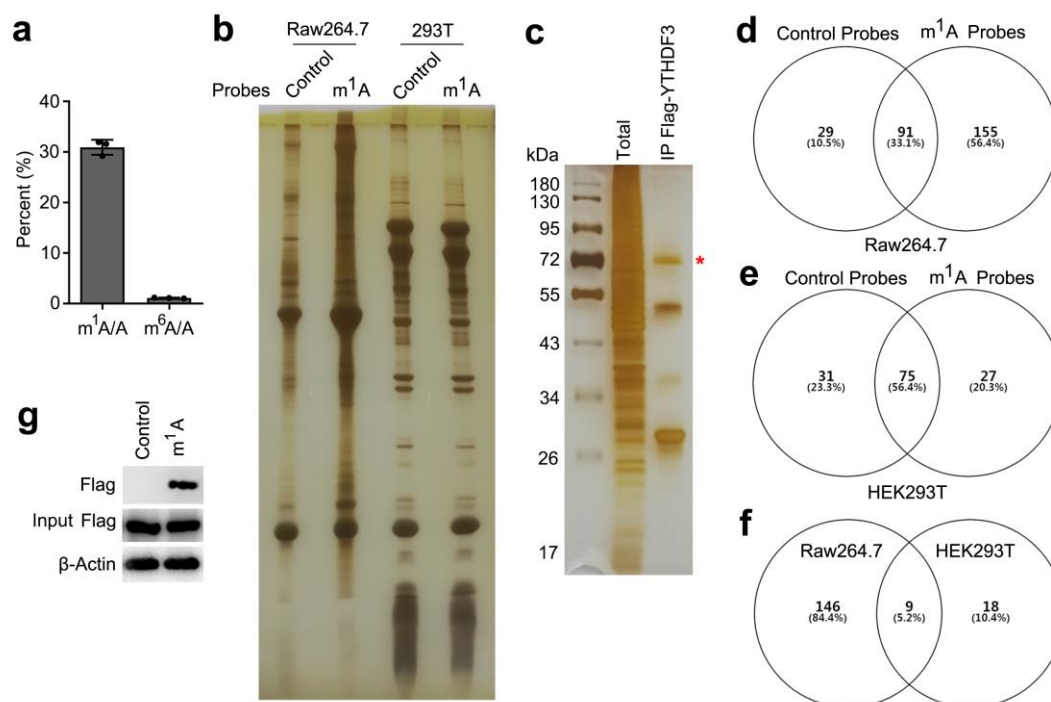

**Supplementary Fig. 1 Identification of interacting proteins with m<sup>1</sup>A modified probes. a**

The m<sup>1</sup>A and m<sup>6</sup>A contents of m<sup>1</sup>A probes from human 28S rRNA gene were quantified by LC-MS/MS. **b** PAGE gel resolution of immunoprecipitated m<sup>1</sup>A probes and its associated proteins from Raw264.7 and HEK293T by silver staining. Different bands were analyzed by MS. **c** PAGE gel resolution of immunoprecipitated YTHDF3 proteins from HEK293T by silver staining. Red \* indicates the YTHDF3 bands. **d-f** Overlap of control probes and m<sup>1</sup>A probes associated proteins in Raw264.7 (**d**), HEK293T (**e**), and overlap of common associated protein between Raw264.7 and HEK293T (**f**). **g** IP and immunoblot analyses of the indicated probes in trophoblast HTR8/SVneo transfected with YTHDF3 plasmid. Data are shown as representative photographs.

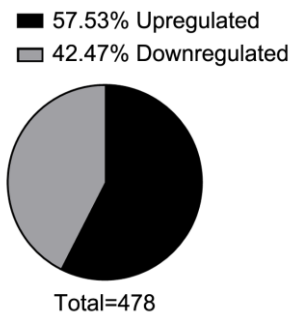

**Supplementary Fig. 2 Transcriptome analysis of trophoblast upon YTHDF3 knockdown.**

Graphs of the significantly changed genes in HTR-8/SVneo upon YTHDF3 knockdown.

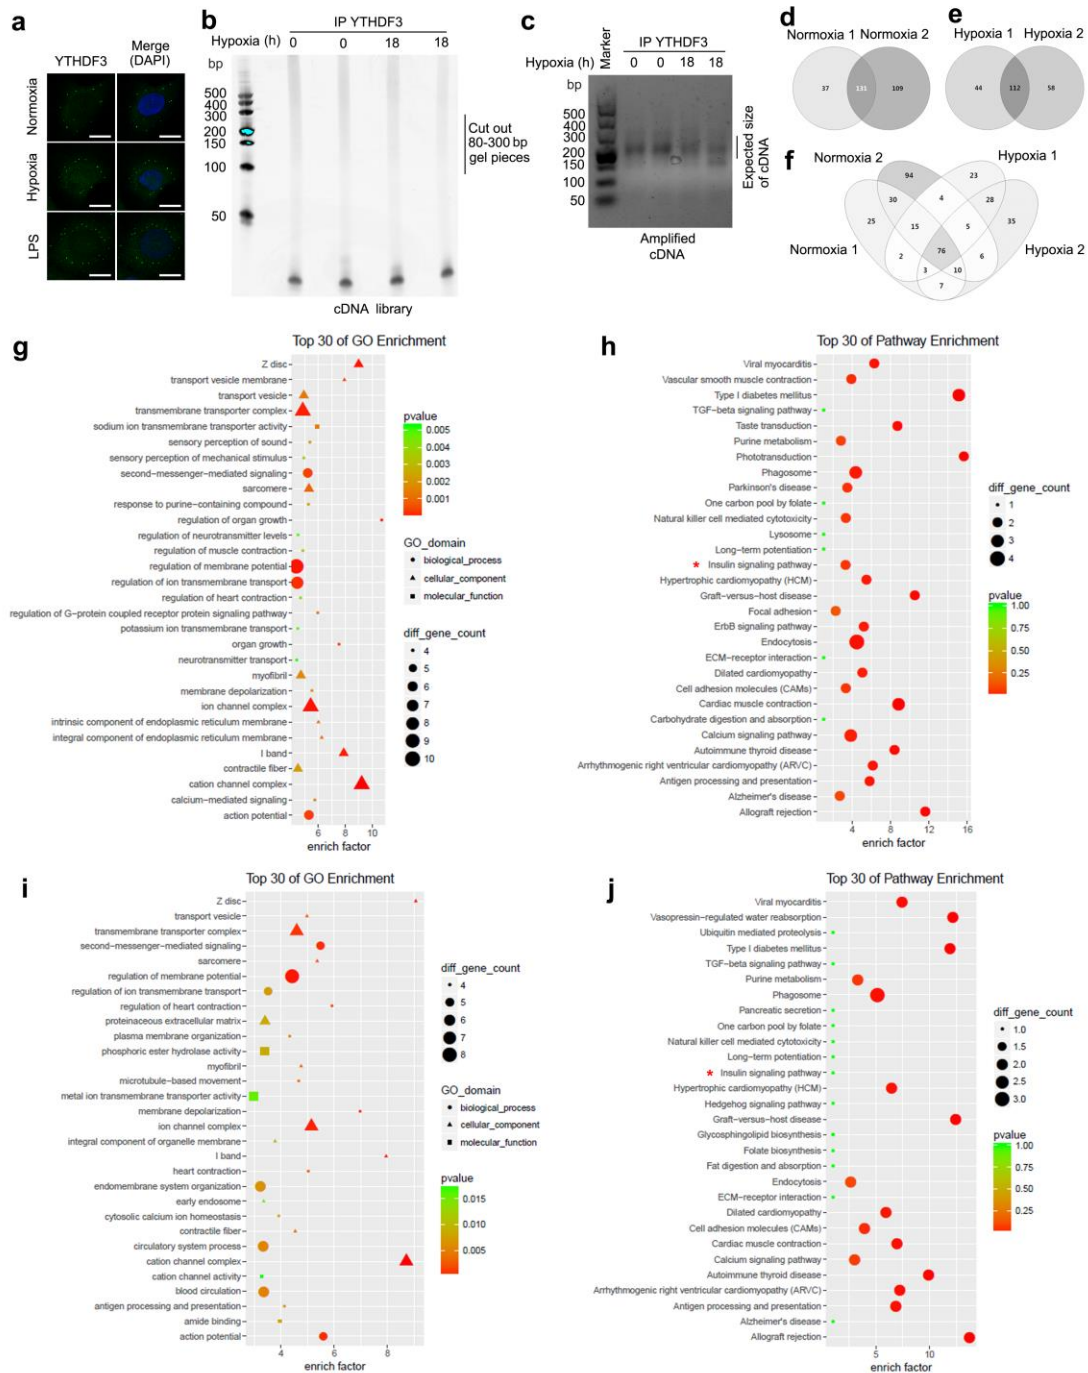

### Supplementary Fig. 3 Gene Ontology (GO) and KEGG analysis of YTHDF3-binding

mRNAs. **a** Confocal microscopy of HTR-8/SVneo treated in hypoxia for 12 h or stimulated with LPS (100ng/mL) for 6 h as indicated, then stained with YTHDF3 antibodies. Scale bar, 10  $\mu$ m. **b** Gel electrophoresis analysis of cDNA treated as indicated for removing free RT primers and size selection. **c** Gel image of amplified cDNA libraries and extraction of the indicated size

ranges. **d,e** Overlap of two biological replicates for iCLIP in normoxia (**d**) or hypoxia (**e**) HTR-8/SVneo cells. **f** Overlap of transcripts identified by iCLIP of YTHDF3 in normoxia or hypoxia HTR-8/SVneo cells. Numbers in **d,e,f** show the sum of genes identified in each sample. **g,h** GO and KEGG analysis of the enriched YTHDF3-binding RNAs in normoxia cells but not in that of the hypoxia cells. **i,j** GO and KEGG analysis of the enriched YTHDF3-bound RNAs in hypoxia cell but not in that of normoxia cell. Red \* indicates the enriched signaling pathway changed upon hypoxia. Data are representative of three independent experiments with similar results (**a,b,c**).

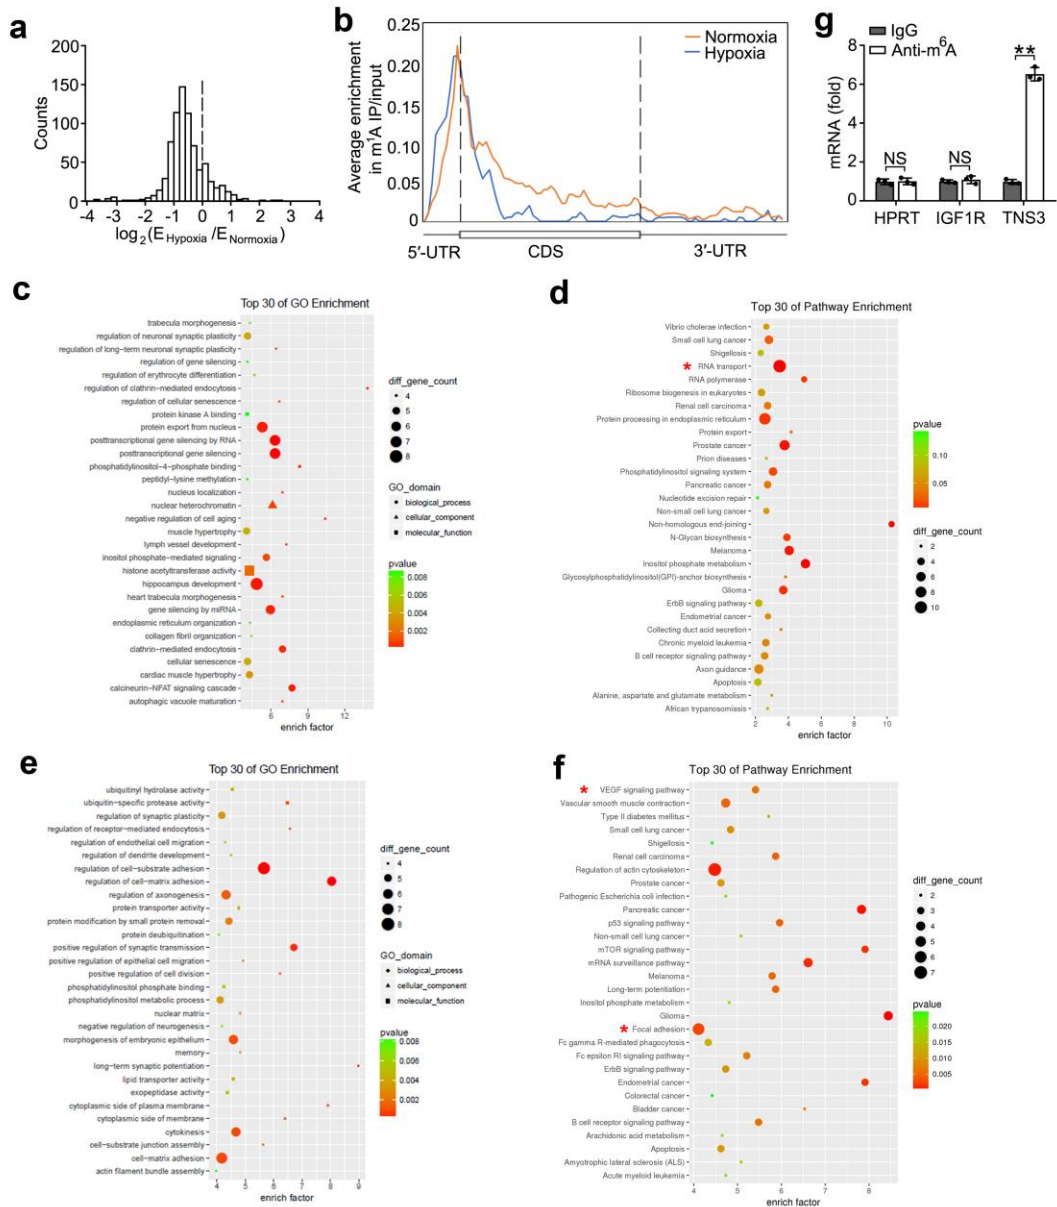

**Supplementary Fig. 4 m<sup>1</sup>A map of trophoblast induced by hypoxia identified by m<sup>1</sup>A-seq.** **a** Histograms showing the changes in m<sup>1</sup>A enrichment in the hypoxia versus normoxia treated HTR-8/SVneo cells. **b** Metagene plots showing the average distribution of m<sup>1</sup>A peaks identified across all transcripts in HTR8/SVneo treated with or without hypoxia for 12 h. **c,d** GO and KEGG analysis of the transcripts with disappeared m<sup>1</sup>A modification in HTR-8/SVneo cells upon hypoxia. **e,f** GO and KEGG analysis of the transcripts with new occurred m<sup>1</sup>A modification in HTR-8/SVneo cells upon hypoxia. **g** Enrichment fold of the indicated RNA transcripts in m<sup>6</sup>A IP versus RNA input control. Red \* indicates the enriched signaling pathway upon hypoxia. NS: not significant; \*\*p<0.01 (Student's t-test). Data are representative of three independent experiments (mean and s.d. of

technical triplicates (**g**).

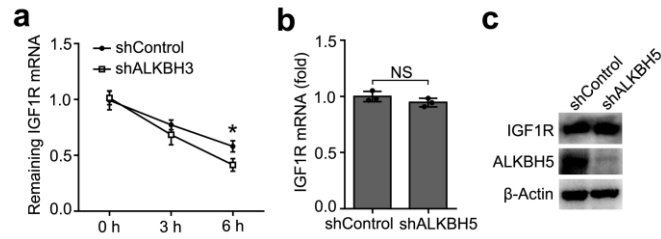

**Supplementary Fig. 5 ALKBH5 knockdown did not affect the expression of IGF1R.** **a** RNA lifetime for IGF1R in HTR-8/SVneo transfected with shControl or shALKBH3 was determined by monitoring transcript abundance after transcription inhibition (TI). **b** qRT-PCR and immunoblot analysis of IGF1R mRNA in HTR-8/SVneo transfected with shControl or shALKBH5 for 72 h. NS: not significant. \* $p < 0.05$  (Student's t-test). Data are representative of three independent experiments (mean and s.d. of technical triplicates (**a,b**)).

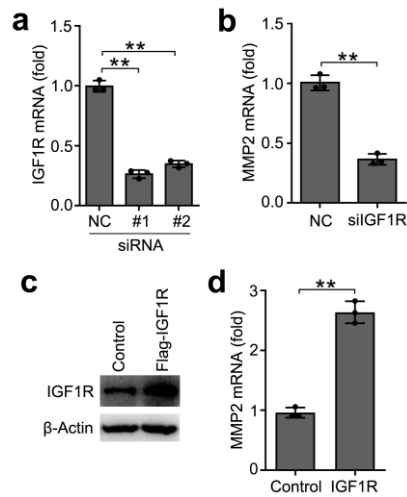

**Supplementary Fig. 6 IGF1R mRNA was efficiently knocked down by RNA interfering.**

**a** qRT-PCR analysis of the IGF1R mRNA in HTR8/SVneo transfected with IGF1R siRNA #1 or #2 as indicated for 48 h. **b** qRT-PCR analysis of the MMP2 mRNA in HTR8/SVneo transfected with IGF1R siRNA #1 for 48 h. **c** Immunoblot analysis of the IGF1R protein in HTR8/SVneo transfected with IGF1R plasmid for 48 h. **d** qRT-PCR analysis of the MMP2 mRNA in HTR8/SVneo transfected with IGF1R plasmid for 48 h. \*\* $p < 0.01$  (Student's t-test). Data are representative of three independent experiments (mean and s.d. of technical triplicates (**a**, **b**, **d**)).



**Supplementary Table S1 Overlap of proteins pulled down by m<sup>1</sup>A probe between Raw264.7 and HEK293T.**

| Gene Name                                             | Raw264.7 |         |       | HEK293T |         |       |
|-------------------------------------------------------|----------|---------|-------|---------|---------|-------|
|                                                       | Score    | Matches | emPAI | Score   | Matches | emPAI |
| ATP synthase subunit alpha,<br>mitochondrial (ATP5A1) | 389      | 24(17)  | 0.8   | 41      | 4(2)    | 0.11  |
| 78 kDa glucose-regulated protein<br>(HSPA5)           | 265      | 20(12)  | 0.56  | 32      | 4(2)    | 0.09  |
| Transcriptional activator protein<br>Pur-alpha (PURA) | 132      | 7(6)    | 0.44  | 38      | 8(4)    | 0.44  |
| Heterogeneous nuclear<br>ribonucleoprotein M (HNRNPM) | 116      | 8(4)    | 0.18  | 23      | 2(2)    | 0.09  |
| ADP/ATP translocase 2 (SLC25A5)                       | 90       | 14(4)   | 0.33  | 39      | 4(1)    | 0.1   |
| RNA-binding protein 28 (RBM28)                        | 65       | 6(2)    | 0.08  | 17      | 6(1)    | 0.04  |
| Poly(rC)-binding protein 1 (PCBP1)                    | 65       | 7(3)    | 0.18  | 152     | 6(5)    | 0.4   |
| YTH domain-containing family<br>protein 3 (YTHDF3)    | 35       | 5(3)    | 0.16  | 165     | 13(10)  | 0.49  |
| RuvB-like 2 (RUVBL2)                                  | 34       | 3(2)    | 0.06  | 28      | 5(1)    | 0.06  |

**Supplementary Table S2 Flowchart of YTHDF3 iCLIP-seq alignment and processing pipeline, resulting in peaks and genes.**

|              | Normoxia    |             | Hypoxia     |             |
|--------------|-------------|-------------|-------------|-------------|
|              | Replicate 1 | Replicate 2 | Replicate 1 | Replicate 2 |
| Input        | 62,513,192  | 76,072,511  | 71,932,433  | 40,094,128  |
| Mapped       | 47,366,424  | 56,910,397  | 55,228,446  | 28,010,060  |
| Mapped/input | 75.77%      | 74.81%      | 76.78%      | 69.86%      |
| Peaks        | 889         | 1,076       | 589         | 567         |
| Genes        | 168         | 240         | 156         | 170         |

**Supplementary Table S3 Flowchart of m<sup>1</sup>A-seq alignment and processing pipeline, resulting in peaks and genes.**

|              | Normoxia       |                | Hypoxia        |                |
|--------------|----------------|----------------|----------------|----------------|
|              | Replicate 1 IP | Replicate 2 IP | Replicate 1 IP | Replicate 2 IP |
| Input        | 50,822,999     | 42,879,965     | 68,974,324     | 70,008,453     |
| Mapped       | 48,913,621     | 41,257,415     | 66,451,984     | 67,095,701     |
| Mapped/input | 96.24%         | 96.22%         | 96.34%         | 95.84%         |
| Peaks        |                | 580            |                | 190            |
| Genes        |                | 489            |                | 181            |

**Supplementary Table S4 siRNA sequences used for RNA interference**

| Human Genes             |              | siRNA sequences (5' to 3') |
|-------------------------|--------------|----------------------------|
| <i>IGF1R</i>            | sense #1     | GCGGAGAGAUGUCAUGCAATT      |
|                         | antisense #1 | UUGCAUGACAUCUCUCCGCTT      |
|                         | sense #2     | GCUUCACCGUUUACUACAATT      |
|                         | antisense #2 | UUGUAGUAAACGGUGAAGCTT      |
| <i>Negative control</i> | sense        | UUCUCCGAACGUGUCACGUTT      |
|                         | antisense    | ACGUGACACGUUCGGAGAATT      |

**Supplementary Table S5 Lentiviral shRNA sequences used for gene interference**

| Human Genes             |               | shRNA sequences (5' to 3') |
|-------------------------|---------------|----------------------------|
| <i>Ythdf3</i>           | target seq #1 | CCTATGGACAAATGAGTAA        |
|                         | target seq #2 | GCAGTGGTATGACTAGCAT        |
| <i>Alkbh3</i>           | target seq    | GGAACAGCTTTGTCAAGAT        |
| <i>Alkbh5</i>           | target seq    | TCGTGTCCGTGTCCTTCTT        |
| <i>Trmt6</i>            | target seq    | CTGAAACGTGAAGATGTGT        |
| <i>Negative control</i> | target seq    | TTCTCCGAACGTGTCACGT        |

**Supplementary Table S6 Primers used for qRT-PCR**

| Human Genes     |         | Primer sequences (5' to 3') |
|-----------------|---------|-----------------------------|
| <i>YTHDF3</i>   | Forward | TGACAACAAACCGGTTACCA        |
|                 | Reverse | TGTTTCTATTTCTCTCCCTACGC     |
| <i>MMP2</i>     | Forward | CCCACTGCGGTTTTCTCGAAT       |
|                 | Reverse | CAAAGGGGTATCCATCGCCAT       |
| <i>MMP9</i>     | Forward | TCCACCCTTGTGCTCTTCCC        |
|                 | Reverse | CTGCCACCCGAGTGTAACCAT       |
| <i>IGF1R</i>    | Forward | AGTGCTGTATGCCTCTGTGAACC     |
|                 | Reverse | ATAGACCATCCCAAACGACCC       |
| <i>18S rRNA</i> | Forward | ACCCGTTGAACCCCATTCGTGA      |
|                 | Reverse | GCCTCACTAAACCATCCAATCGG     |
| <i>HPRT</i>     | Forward | CCTGGCGTCGTGATTAGTGAT       |
|                 | Reverse | AGACG TTCAGTCCTGTCCATAA     |
| <i>TNS3</i>     | Forward | CAGGGGTGGTAAAGGACGC         |
|                 | Reverse | GGAGGGCTCCATTAAAGCTGAA      |
| <i>SOX18</i>    | Forward | AAAGCGTGGAAGGAGCTGAA        |
|                 | Reverse | CGGTA CTTGTAGTTGGGGTGGT     |
| <i>NFATC3</i>   | Forward | TATTTCGCACATCTTCATTACC      |
|                 | Reverse | CCCTCGGCTACCTTCAGT          |
| <i>GAPDH</i>    | Forward | GCCAAGGTCATCCATGACA ACTTTGG |
|                 | Reverse | GCCTGCTTCACCACCTTCTTGATGTC  |
| <i>Actb</i>     | Forward | CATGTACGTTGCTATCCAGGC       |
|                 | Reverse | CTCCTTAATGTCACGCACGAT       |

**Supplementary Table S7 PCR primers used for human genes cloning**

| Human Genes   |         | Primer sequences (5' to 3')                  |
|---------------|---------|----------------------------------------------|
| <i>YTHDF3</i> | Forward | CCGCTCGAGATGTCAGCCACTAGCGTGGA                |
|               | Reverse | GGGAAGCTTTTATTGTTTGTTTCTATTTCTCTCC           |
| <i>YTHDF2</i> | Forward | CCGCTCGAGATGTCGGCCAGCAGCCTCTT                |
|               | Reverse | GCCGGTACCTTATTTCCCACGACCTTGACGT              |
| <i>YTHDF1</i> | Forward | CCGCTCGAGATGTCGGCCACCAGCGTGGA                |
|               | Reverse | GCCGGTACCTCATTGTTTGTTTCGACTCTGCC             |
| <i>IGF1R</i>  | Forward | CCGGAATTCATGAAGTCTGGCTCCGGAGGAGG             |
|               | Reverse | CGCGGATCCTCAGCAGGTCGAAGACTGGGGC              |
| <i>ALKBH3</i> | Forward | ATAAGAATGCGGCCGCCAATGGAGGAAAAAAGAC<br>GGCGAG |
|               | Reverse | CACGGGAAGCTTTCACCAGGGTGCCCCTCGAG             |
